# Supplementary material for: Epigenetic Regulation of MicroRNA Genes and the Role of miR-34b in Cell Invasion and Motility in Human Melanoma
Source: PubMed Central journal article supplement (PMC3176288; doi:10.1371/journal.pone.0024922), 2011-09-19
Supplement: pone.0024922.s005.pdf [file pone.0024922.s005.pdf]

Table S1. Differential expression of mRNAs in miR-34b-expressing melanoma cells.

| Gene Name | Bioscope    |                       | BFAST       |                       |
|-----------|-------------|-----------------------|-------------|-----------------------|
|           | Fold Change | Transcript Difference | Fold Change | Transcript Difference |
| FCRLA     | 2.85        | 17.76                 | 2.84        | 14.95                 |
| MMP8      | 2.80        | 12.14                 | 2.86        | 10.55                 |
| S100B     | 2.45        | 70.71                 | 2.35        | 59.92                 |
| RCAN1     | 2.38        | 44.75                 | 2.34        | 43.98                 |
| SERPINA3  | 2.37        | 13.31                 | 2.45        | 10.54                 |
| ACAN      | 2.19        | 16.51                 | 2.20        | 18.43                 |
| HLA-DRB1  | 2.18        | 22.90                 | 2.27        | 15.71                 |
| MIA       | 1.90        | 37.10                 | 1.90        | 31.30                 |
| COL9A3    | 1.84        | 21.05                 | 1.78        | 13.40                 |
| IGFBP2    | 1.80        | 60.38                 | 1.75        | 46.90                 |
| CADM4     | 1.79        | 12.86                 | 1.79        | 10.14                 |
| FASN      | 1.73        | 18.85                 | 1.72        | 15.03                 |
| HLA-DRA   | 1.73        | 23.99                 | 1.76        | 20.43                 |
| RPL37A    | 1.70        | 41.46                 | 1.67        | 25.39                 |
| MARCKSL1  | 1.68        | 12.59                 | 1.68        | 10.96                 |
| KLF9      | 1.61        | 14.83                 | 1.60        | 12.71                 |
| NT5E      | 1.55        | 18.87                 | 1.53        | 15.25                 |
| THBS2     | 1.55        | 123.34                | 1.53        | 100.99                |
| RPL24     | 1.52        | 16.61                 | 1.79        | 12.58                 |
| MMP14     | -1.54       | 14.10                 | -1.54       | 11.92                 |
| CAV1      | -1.55       | 18.48                 | -1.52       | 15.33                 |
| TNS3      | -1.56       | 37.76                 | -1.57       | 32.33                 |
| CXCL1     | -1.57       | 164.16                | -1.55       | 136.23                |
| TGFBI     | -1.58       | 23.76                 | -1.60       | 19.23                 |
| COL6A1    | -1.60       | 11.91                 | -1.64       | 10.43                 |
| SEMA3C    | -1.61       | 14.88                 | -1.61       | 12.41                 |
| CYR61     | -1.63       | 31.05                 | -1.60       | 25.31                 |
| PDE1C     | -1.66       | 16.34                 | -1.67       | 13.00                 |
| CRIM1     | -1.66       | 13.32                 | -1.69       | 11.42                 |
| ITGB5     | -1.71       | 13.47                 | -1.67       | 10.36                 |
| IL6       | -1.72       | 15.64                 | -1.62       | 11.43                 |
| PTTG1IP   | -1.73       | 19.63                 | -1.73       | 16.78                 |
| FSTL1     | -1.74       | 25.38                 | -1.76       | 21.59                 |
| LOXL2     | -1.75       | 60.13                 | -1.79       | 52.37                 |
| UGCG      | -1.76       | 19.21                 | -1.76       | 14.74                 |
| AP2M1     | -1.82       | 15.15                 | -1.84       | 23.31                 |
| IGFBP7    | -2.09       | 50.32                 | -2.12       | 43.32                 |
| WNT5A     | -2.16       | 18.11                 | -2.19       | 16.19                 |
| ALCAM     | -2.33       | 12.29                 | -2.31       | 10.22                 |
| TXNIP     | -2.33       | 30.21                 | -2.34       | 26.14                 |
| FBN1      | -2.55       | 25.18                 | -2.54       | 20.45                 |
| ID3       | -2.71       | 19.97                 | -2.63       | 16.00                 |
| S100A16   | -2.86       | 27.00                 | -2.84       | 23.09                 |
| ITGA3     | -3.63       | 18.17                 | -3.42       | 21.36                 |
| SERPINB2  | -3.68       | 14.12                 | -3.64       | 14.77                 |
| LYPD1     | -3.86       | 14.43                 | -3.98       | 16.85                 |
| TNFRSF21  | -4.00       | 25.16                 | -3.92       | 22.18                 |
| STC2      | -4.44       | 12.45                 | -4.48       | 11.00                 |
| SRGN      | -5.87       | 17.37                 | -5.67       | 14.98                 |
| IL1B      | -7.58       | 221.43                | -8.10       | 185.64                |
| DKK1      | -9.27       | 18.26                 | -9.27       | 15.87                 |
| INHBA     | -9.48       | 12.28                 | -8.84       | 9.96                  |
| STC1      | -22.72      | 11.88                 | -21.23      | 10.85                 |
