# Supplementary material for: Epigenetic Regulation of MicroRNA Genes and the Role of miR-34b in Cell Invasion and Motility in Human Melanoma
Source: PubMed Central journal article supplement (PMC3176288; doi:10.1371/journal.pone.0024922), 2011-09-19
Supplement: pone.0024922.s006.pdf [file pone.0024922.s006.pdf]

Table S2. Differential expression of miRNAs in miR-34b expressing melanoma cells.

| miRNA Name | Bioscope    |                       | BFAST       |                       |
|------------|-------------|-----------------------|-------------|-----------------------|
|            | Fold Change | Transcript Difference | Fold Change | Transcript Difference |
| MIR663     | 12.50       | 70.74                 | 1.71        | 29.24                 |
| MIR663B    | 4.48        | 35.55                 | 1.99        | 27.73                 |
| MIR140     | 3.65        | 21.18                 | 2.16        | 10.76                 |
| MIR409     | 3.50        | 12.15                 | 5.11        | 7.38                  |
| MIR34B     | 3.26        | 11.50                 | 4.95        | 3.95                  |
| MIR1323    | 3.16        | 9.85                  | 1.58        | 2.73                  |
| MIR154     | 3.14        | 6.63                  | 1.83        | 3.01                  |
| MIR134     | 3.02        | 6.50                  | 1.80        | 1.42                  |
| MIR20B     | 2.78        | 6.06                  | 1.50        | 5.24                  |
| MIR494     | 2.72        | 5.38                  | 2.08        | 1.75                  |
| MIR199B    | 2.68        | 5.06                  | 1.67        | 3.68                  |
| MIR660     | 2.65        | 4.70                  | 3.11        | 5.07                  |
| MIR149     | 2.59        | 4.50                  | 1.91        | 5.56                  |
| MIR453     | 2.44        | 4.29                  | 2.93        | 2.27                  |
| MIR432     | 2.38        | 4.17                  | 1.78        | 3.76                  |
| MIR495     | 2.35        | 4.14                  | 2.94        | 3.47                  |
| MIR410     | 2.30        | 3.86                  | 2.01        | 2.38                  |
| MIR301A    | 2.17        | 3.86                  | 1.62        | 2.25                  |
| MIR431     | 1.90        | 3.63                  | 1.75        | 3.13                  |
| MIR496     | 1.90        | 3.37                  | 1.60        | 2.25                  |
| MIR487A    | 1.83        | 2.96                  | 2.06        | 1.56                  |
| MIR1197    | 1.83        | 2.86                  | 1.58        | 1.06                  |
| MIR376A2   | 1.82        | 2.78                  | 2.08        | 1.14                  |
| MIR518A2   | 1.74        | 2.74                  | 1.88        | 1.16                  |
| MIR382     | 1.72        | 2.70                  | 1.95        | 1.12                  |
| MIR362     | 1.70        | 2.09                  | 1.82        | 1.56                  |
| MIR656     | 1.64        | 2.08                  | 1.97        | 1.08                  |
| MIR425     | 1.62        | 1.82                  | 1.55        | 1.66                  |
| MIR323     | 1.57        | 1.76                  | 2.24        | 1.78                  |
| MIR380     | 1.54        | 1.65                  | 2.14        | 1.14                  |
| MIR501     | 1.52        | 1.44                  | 2.26        | 1.26                  |
| MIR1205    | 1.51        | 1.32                  | 1.72        | 1.06                  |
| MIR181D    | 1.51        | 1.32                  | 1.55        | 1.22                  |
